# Supplementary material
Source: PubMed Central journal article supplement (PMC5561335)
Supplement: npp2016271x2.pdf [file npp2016271x2.pdf]

Supplementary Table 1

| <b>Protein</b> | <b>Company</b> | <b>Catalogue number</b> | <b>Antibody Concentration</b> | <b>Molecular Weight (kDa)</b> |
|----------------|----------------|-------------------------|-------------------------------|-------------------------------|
| P-mTOR S2448   | Cell Signaling | 2971                    | 1:1000                        | 289                           |
| P-mTOR S2481   | Cell Signaling | 2481                    | 1:1000                        | 289                           |
| mTOR           | Cell Signaling | 2972                    | 1:1000                        | 289                           |
| P-TSC2 T1462   | Cell Signaling | 3611                    | 1:1000                        | 200                           |
| TSC2           | Cell Signaling | 3612                    | 1:1000                        | 200                           |
| P-Akt T308     | Cell Signaling | 9275                    | 1:1000                        | 60                            |
| P-Akt S473     | Cell Signaling | 9271                    | 1:1000                        | 60                            |
| Akt            | Cell Signaling | 9272                    | 1:1000                        | 60                            |
| P-FoxO3a S253  | Cell Signaling | 9466                    | 1:1000                        | 90                            |
| FoxO3a         | Millipore      | 07-702                  | 1:1000                        | 90                            |
| P-FoxO3a T32   | Abcam          | ab26649                 | 1:1000                        | 90                            |
| p70S6K1        | Abcam          | ab70271                 | 1:1000                        | 70                            |
| P-p70S6K1 T389 | Millipore      | MAES82                  | 1:750                         | 70                            |
| REDD1          | Proteintech    | 10638-1-AP              | 1:2000                        | 35                            |
| GAPDH          | Abcam          | ab2255                  | 1:20,000                      | 37                            |

Supplementary Table 2

| <b>Gene</b>  | <b>Forward Primer</b>    | <b>Reverse Primer</b>     | <b>PrimerBank ID</b> |
|--------------|--------------------------|---------------------------|----------------------|
| <i>Redd1</i> | CAAGGCAAGAGCTGCCATA<br>G | CCGGTACTTAGCGTCAGGG       | 21312868a1           |
| <i>foxo3</i> | CTGGGGGAACCTGTCCTAT<br>G | TCATTCTGAACGCGCATGA<br>AG | 9789951a1            |
