# Supplementary material
Source: PubMed Central journal article supplement (PMC5561335)

Supplementary Figure 1

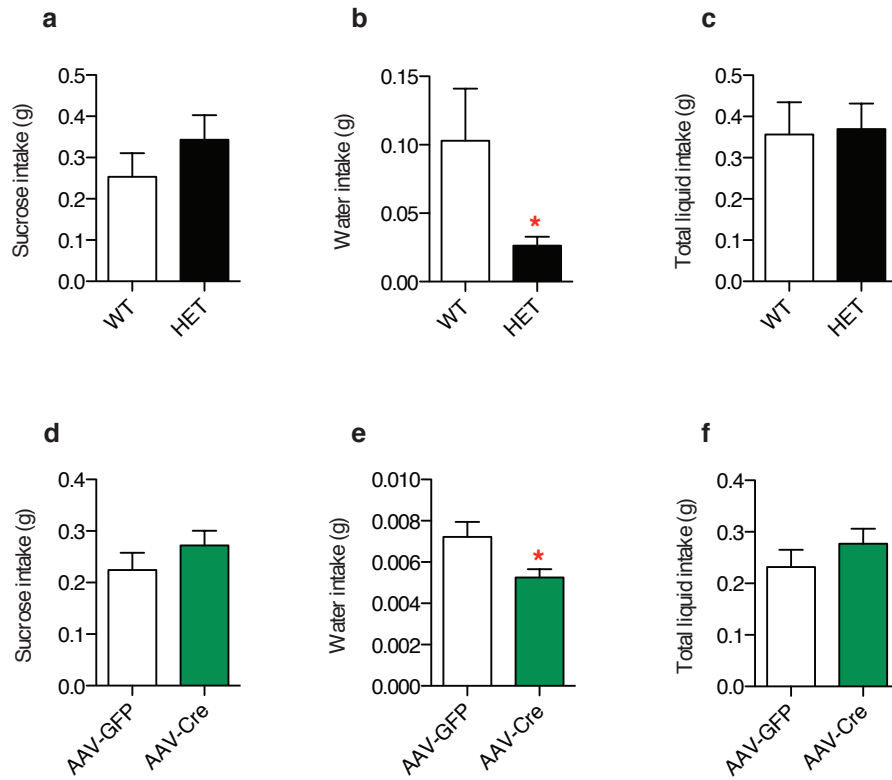

Supplementary Figure 2

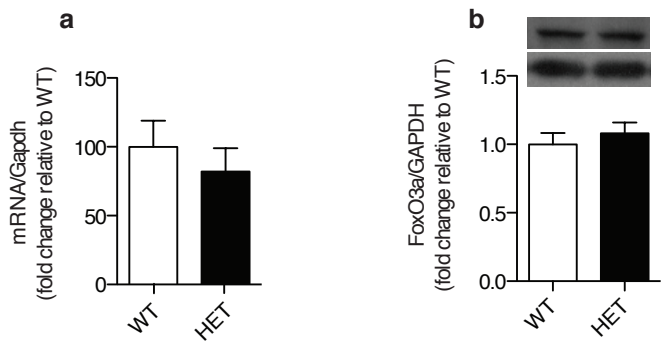

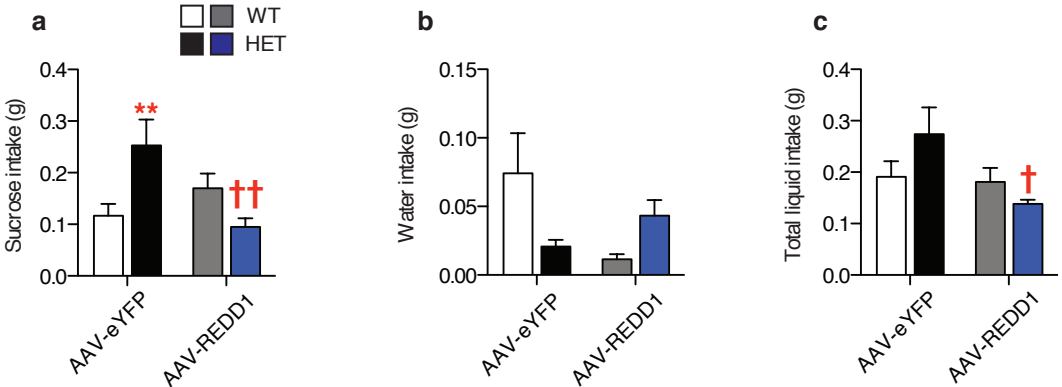

Supplement: npp2016271x1.pdf [file npp2016271x1.pdf]
